# Supplementary material for: Cardiotoxicity and Cardioprotection by Artesunate in Larval Zebrafish
Source: PubMed Central journal article supplement — Dose Response. 2020 Jan 13;18(1):1559325819897180. doi: 10.1177/1559325819897180 (PMC6958657; doi:10.1177/1559325819897180), 2020-01-13
Supplement: Table_S1.pdf [file Table_S1.pdf]

Table S1. Gene expressions in zebrafishes significantly differed between model and normal control (NC) groups (model vs NC).

| Gene name (id)              | base Mean | log2(Fold change) | lfc SE | P value  | adjusted P value | Direction to NC |
|-----------------------------|-----------|-------------------|--------|----------|------------------|-----------------|
| <i>Coro1cb</i> (gene13501)* | 285.335   | 2.377             | 0.648  | 0.000243 | 0.004508         | Up              |
| <i>Srsf7a</i> (gene13621)   | 280.438   | -2.027            | 0.218  | 0.000000 | 0.000000         | Down            |
| <i>Creb3l3l</i> (gene18270) | 154.402   | -2.207            | 0.381  | 0.000000 | 0.000000         | Down            |
| <i>Ndufb9</i> (gene26321)*  | 104.675   | 3.699             | 0.413  | 0.000000 | 0.000000         | Up              |
| <i>Fabp11b</i> (gene26534)  | 116.002   | 2.779             | 0.338  | 0.000000 | 0.000000         | Up              |
| <i>Siah2l</i> (gene33082)   | 525.329   | -2.195            | 0.148  | 0.000000 | 0.000000         | Down            |
| <i>Atp6v1aa</i> (gene40320) | 205.116   | -2.274            | 0.238  | 0.000000 | 0.000000         | Down            |
| <i>Ankra2</i> (gene40443)   | 81.303    | -3.046            | 0.404  | 0.000000 | 0.000000         | Down            |
| <i>Fzd7a</i> (gene41822)*   | 376.316   | 4.752             | 0.763  | 0.000000 | 0.000000         | Up              |
| <i>Ywhag2</i> (gene43404)   | 704.919   | 6.387             | 2.125  | 0.002646 | 0.032297         | Up              |
| <i>Agrn</i> (gene45253)     | 98.952    | 2.792             | 0.493  | 0.000000 | 0.000001         | Up              |
| <i>Hsp90b1</i> (gene45884)  | 107.389   | 2.301             | 0.376  | 0.000000 | 0.000000         | Up              |
| <i>Rbb4l</i> (gene47307)    | 198.712   | -2.722            | 0.286  | 0.000000 | 0.000000         | Down            |
| <i>Tm9sf2</i> (gene599)     | 351.577   | -2.543            | 0.228  | 0.000000 | 0.000000         | Down            |

\*Genes which were reversedly regulated by ART
