# Supplementary material for: Cardiotoxicity and Cardioprotection by Artesunate in Larval Zebrafish
Source: PubMed Central journal article supplement — Dose Response. 2020 Jan 13;18(1):1559325819897180. doi: 10.1177/1559325819897180 (PMC6958657; doi:10.1177/1559325819897180), 2020-01-13
Supplement: Table_S2.pdf [file Table_S2.pdf]

Table S2. Gene expressions in zebrafishes significantly differed between model and ART groups (model vs ART).

| Gene name (id)              | base Mean | log2(Fold change) | lfc SE | P value  | adjusted P value | Direction to NC |
|-----------------------------|-----------|-------------------|--------|----------|------------------|-----------------|
| <i>Coro1cb</i> (gene13501)* | 294.355   | 2.828             | 0.643  | 0.000011 | 0.002587         | Up              |
| <i>Ctdspl3</i> (gene21104)  | 61.055    | -2.673            | 0.491  | 0.000000 | 0.000022         | Down            |
| <i>Gpx1a</i> (gene21678)    | 59.750    | 2.277             | 0.556  | 0.000043 | 0.008804         | Up              |
| <i>Ndufb9</i> (gene26321)*  | 113.789   | 3.571             | 0.762  | 0.000003 | 0.000736         | Up              |
| <i>Ndufa12</i> (gene40151)  | 304.710   | -2.624            | 0.679  | 0.000113 | 0.019448         | Down            |
| <i>Mapk1</i> (gene40248)    | 76.557    | 4.615             | 0.546  | 0.000000 | 0.000000         | Up              |
| <i>Fbp1b</i> (gene40457)    | 39.916    | -2.283            | 0.561  | 0.000047 | 0.009496         | Down            |
| <i>Ifrd2</i> (gene41555)    | 94.081    | -2.637            | 0.459  | 0.000000 | 0.000005         | Down            |
| <i>Slc16alb</i> (gene41567) | 99.784    | -4.174            | 0.436  | 0.000000 | 0.000000         | Down            |
| <i>Fzd7a</i> (gene41822)*   | 410.505   | 4.385             | 0.495  | 0.000000 | 0.000000         | Up              |
| <i>Hao2</i> (gene41858)     | 71.545    | 3.385             | 0.577  | 0.000000 | 0.000003         | Up              |
| <i>Crygm2d3</i> (gene41894) | 91.438    | -2.631            | 0.474  | 0.000000 | 0.000013         | Down            |
| <i>Cdc6</i> (gene42384)     | 45.135    | 3.089             | 0.594  | 0.000000 | 0.000067         | Up              |
| <i>Trap</i> (gene42648)     | 76.183    | 3.251             | 0.509  | 0.000000 | 0.000000         | Up              |
| <i>Wdr32</i> (gene42948)    | 52.653    | -2.955            | 0.624  | 0.000002 | 0.000568         | Down            |
| <i>Pa2g4b</i> (gene45274)   | 81.910    | 2.241             | 0.395  | 0.000000 | 0.000007         | Up              |
| <i>Sept15</i> (gene45549)   | 30.087    | 2.246             | 0.630  | 0.000365 | 0.046135         | Up              |

|                           |        |        |       |          |          |      |
|---------------------------|--------|--------|-------|----------|----------|------|
| <i>Dip2bb</i> (gene46161) | 32.790 | -2.829 | 0.786 | 0.000317 | 0.041695 | Down |
| <i>Arl5a</i> (gene46314)  | 39.499 | -2.102 | 0.534 | 0.000084 | 0.015434 | Down |
| <i>Mrpl49</i> (gene46394) | 44.423 | 3.781  | 0.653 | 0.000000 | 0.000004 | Up   |
| <i>Mgst1.1</i> (gene5335) | 31.320 | -3.854 | 0.761 | 0.000000 | 0.000130 | Down |

---

\*Genes which were abnormally expressed in model group
